# Supplementary material for: Histone H3K36me2 demethylase KDM2A promotes bladder cancer progression through epigenetically silencing RARRES3
Source: PubMed Central journal article supplement (PMC9192503; doi:10.1038/s41419-022-04983-7), 2022-06-13

Supplementary Figure 1

B

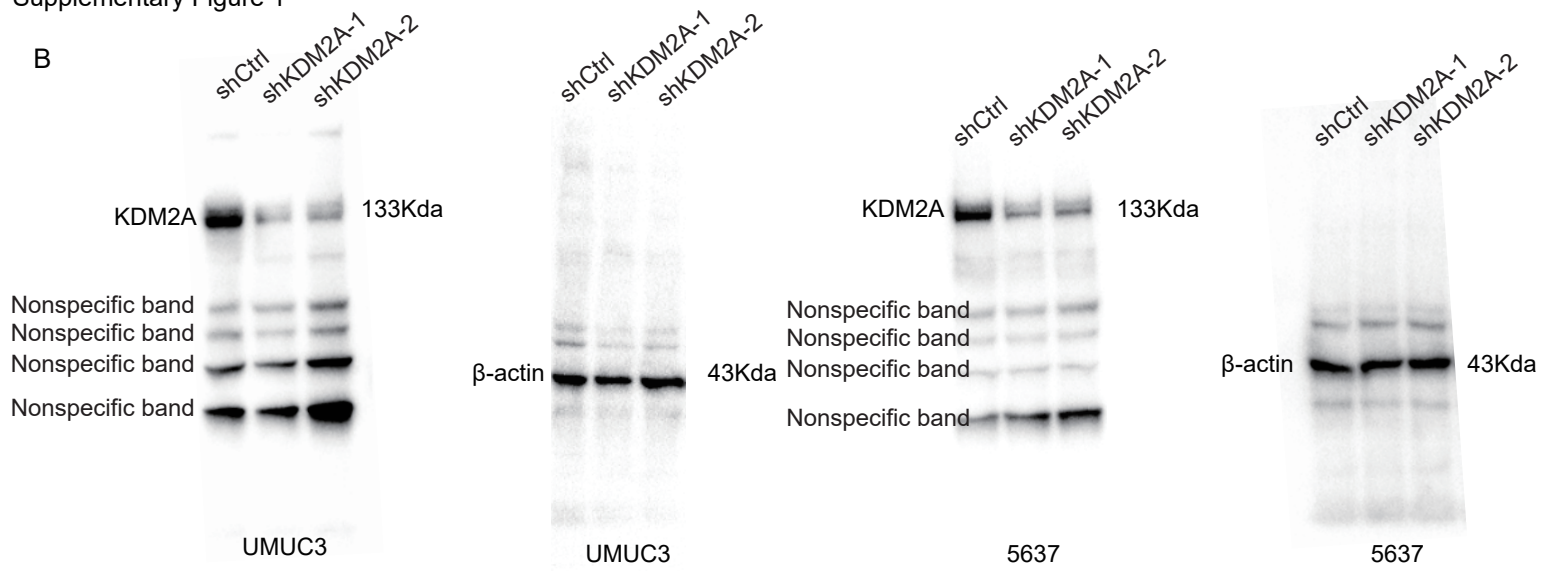

C

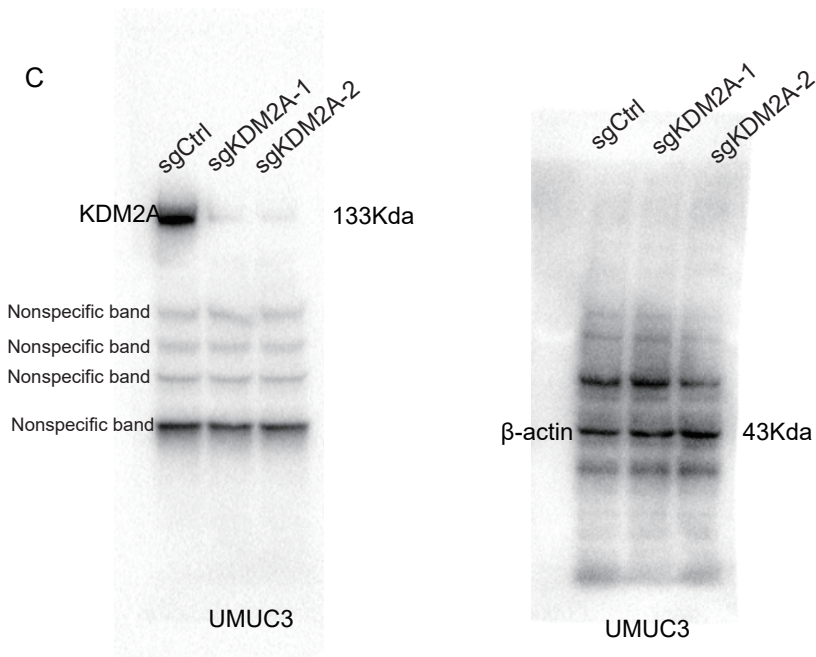

Supplementary Figure 3

A

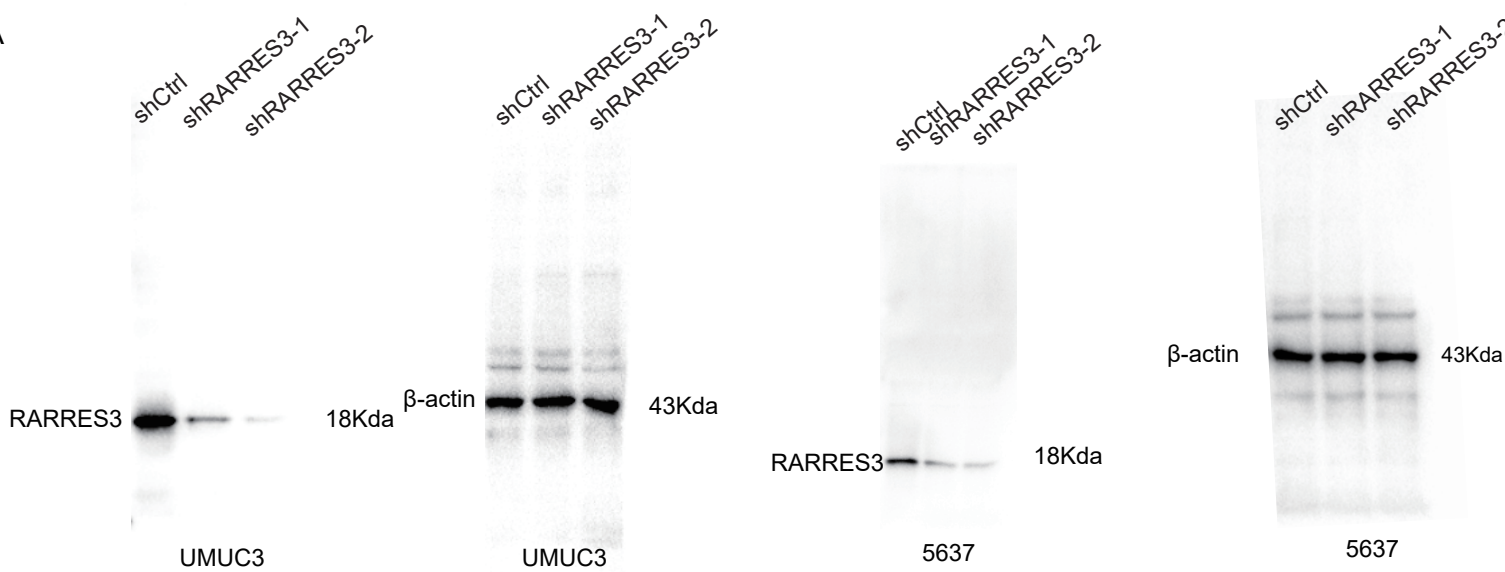

Supplement: 41419_2022_4983_MOESM3_ESM.pdf [file 41419_2022_4983_MOESM3_ESM.pdf]
